# Supplementary material for: Using Multi-Head Attention Deep Neural Network for Bias Correction and Downscaling for Daily Rainfall Pattern of a Subtropical Island
Source: Copernicus journal article supplement (doi:10.5194/egusphere-2024-1022), 2024-04-29
Supplement: Supplementary file 1 [file egusphere-2024-1022-supplement.pdf]

Supplementary materials for Wang et al. (2024): Using Multi-Head Attention Deep Neural Network for Bias Correction and Downscaling for Daily Rainfall Pattern of a Subtropical Island

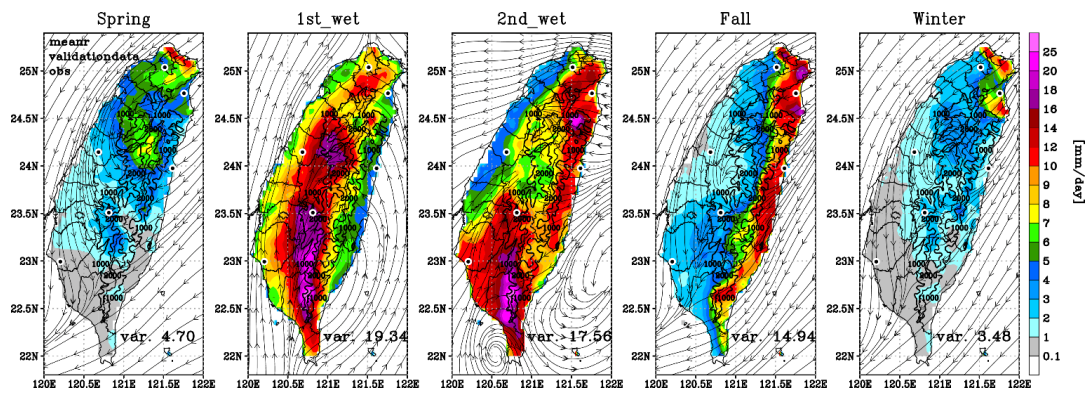

Figure S1: Similar to Figure 1(c), but for the validation period (2014/11/25-2017/12/12).
